# Supplementary material
Source: Springer Nature journal article supplement (https://www.springermedizin.de/resource/supplementary/12974_2011_384_MOESM1_ESM.pdf/9601554)

### A: IL-1 $\beta$

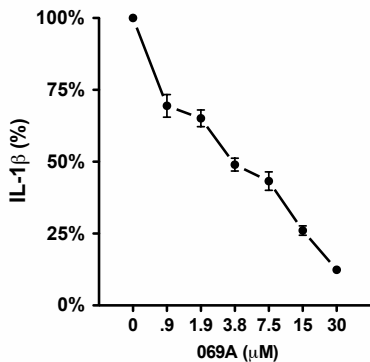

### B: TNF $\alpha$

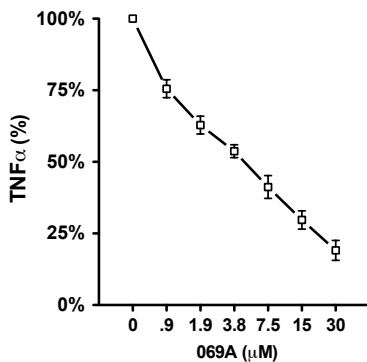

### C: IL-1 $\beta$

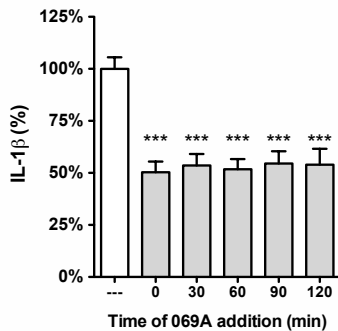

### D: TNF $\alpha$

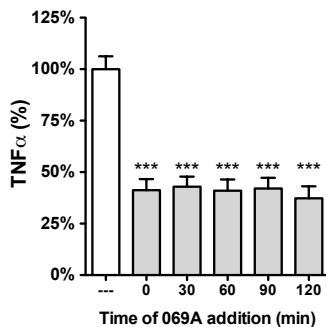

Supplement: MOESM1 [file 9601554]
